# Supplementary material for: Diabetes and all-cause mortality, a 18-year follow-up study
Source: PubMed Central journal article supplement (PMC7035261; doi:10.1038/s41598-020-60142-y), 2020-02-21
Supplement: 41598_2020_60142_MOESM1_ESM.pdf [file 41598_2020_60142_MOESM1_ESM.pdf]

## **Diabetes and all-cause mortality, a 18-year follow-up study**

Rezvan Salehidoost<sup>1</sup>, Asieh Mansouri<sup>2</sup>, Massoud Amini<sup>3\*</sup>, Sima Aminorroaya Yamini<sup>4</sup>, Ashraf Aminorroaya<sup>3\*</sup>

Isfahan Endocrine and Metabolism Research Center, Isfahan University of Medical Sciences, Isfahan, Iran

<sup>1</sup>Assistant professor, Isfahan Endocrine and Metabolism Research Center, Isfahan University of Medical sciences, Isfahan, Iran

<sup>2</sup>PhD of Epidemiology, Hypertension Research Center, Cardiovascular Research Institute, Isfahan University of Medical Sciences, Isfahan, Iran

<sup>3</sup>Professors of Endocrinology, Isfahan Endocrine and Metabolism Research Center, Isfahan University of Medical Sciences, Isfahan, Iran

<sup>4</sup>Reader, Department of Engineering and Mathematics, Sheffield Hallam University, Sheffield, S1 1WB, UK.

\*Corresponding author: Prof.Ashraf Aminorroaya and Prof.MassoudAmini

Table S1. Baseline characteristics of patients with T2DM by participation status

| Variables               | Included participants<br>(n=2451) | Excluded participants<br>(n=9246) | P-value <sup>a</sup> |
|-------------------------|-----------------------------------|-----------------------------------|----------------------|
|                         | Mean (SD)                         | Mean (SD)                         |                      |
| BMI(kg/m <sup>2</sup> ) | 27.7 (4.5)                        | 27.7 (4.6)                        | 0.492                |
| SBP (mmHg)              | 127.1 (20.2)                      | 125.5 (20.0)                      | < 0.001              |
| DBP (mmHg)              | 78.4 (12.3)                       | 77.0 (12.4)                       | < 0.001              |
| FPG (mg/dl)             | 186.9 (71.6)                      | 199.6 (73.5)                      | < 0.001              |
| Total-C (mg/dl)         | 219.9 (50.0)                      | 221.0 (51.0)                      | 0.251                |
| TG (mg/dl)              | 219.3 (146.1)                     | 229.7 (155.7)                     | 0.006                |
| HDL-C (mg/dl)           | 44.5 (11.4)                       | 45.5 (11.9)                       | 0.267                |
| LDL-C (mg/dl)           | 130.3 (42.4)                      | 127.3 (42.2)                      | 0.261                |
| HbA1c (%)               | 8.4 (2.1)                         | 8.6 (2.4)                         | < 0.001              |

<sup>a</sup>P value based on Student's T-test between total included participants and excluded participants, T2DM: type 2 diabetes mellitus, BMI: body mass index; SBP: systolic blood pressure; DBP: diastolic blood pressure; FPG: fasting plasma glucose, C: Cholesterol, TG: triglyceride, HDL: high density lipoprotein, LDL: low density lipoprotein
